# Supplementary material for: Explaining the period fluctuation of the quasi-biennial oscillation
Source: Copernicus journal article supplement (doi:10.5194/egusphere-2024-3195), 2024-10-18

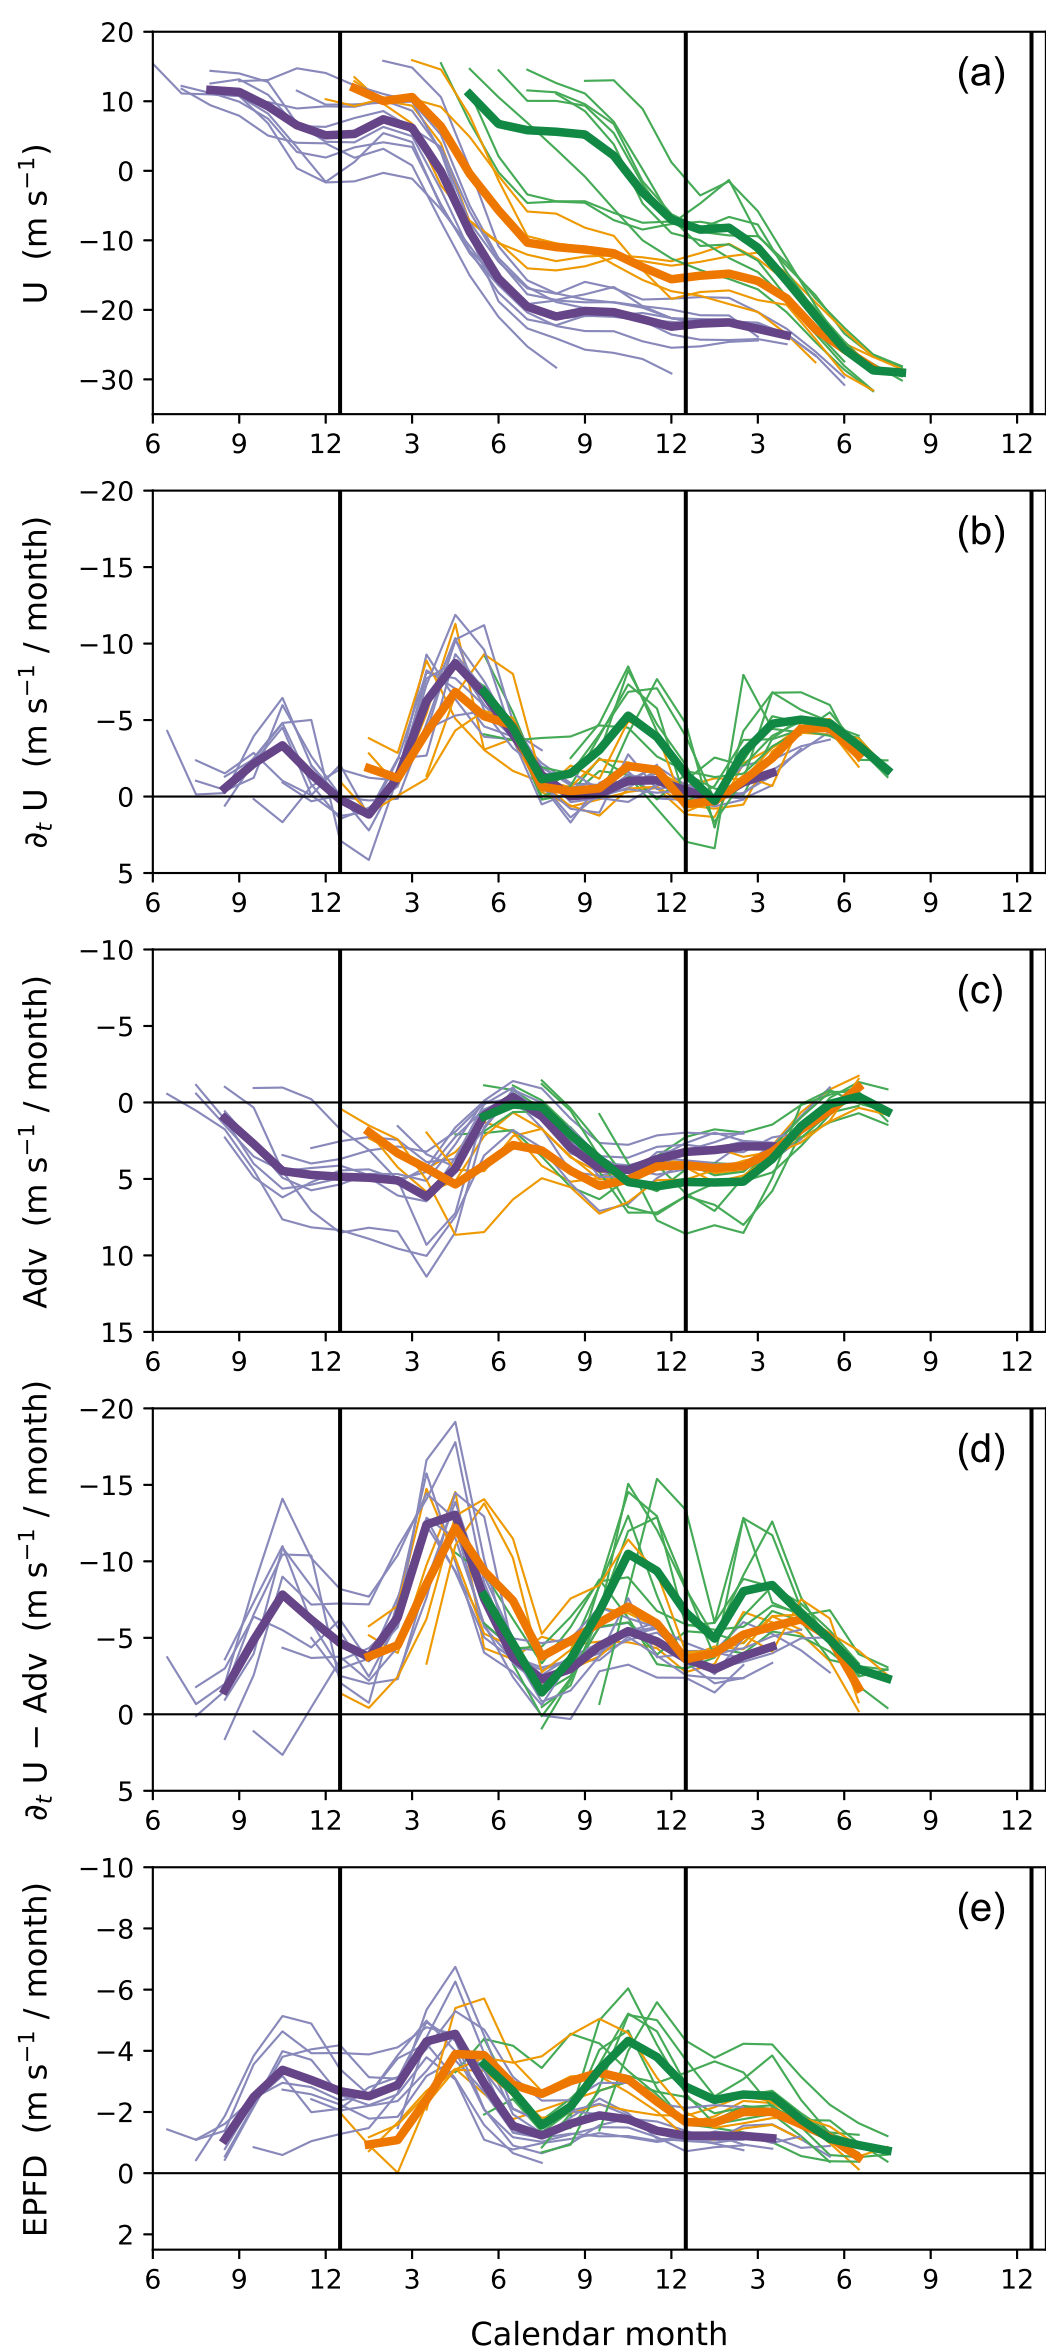

Supplement: Supplementary file [file egusphere-2024-3195-AC1-supplement.pdf]
